# Supplementary material for: Preparation and Characterization of Self Nano-Emulsifying Drug Delivery System Loaded with Citraland Its Antiproliferative Effect on Colorectal Cells In Vitro
Source: MDPI journal article supplement (doi:10.3390/nano9071028), 2019-07-18

**Supplementary Table S1.** The optical observations of the 27 designations of self nano-emulsifying drug delivery system (SNEDDS) (F1–F27).

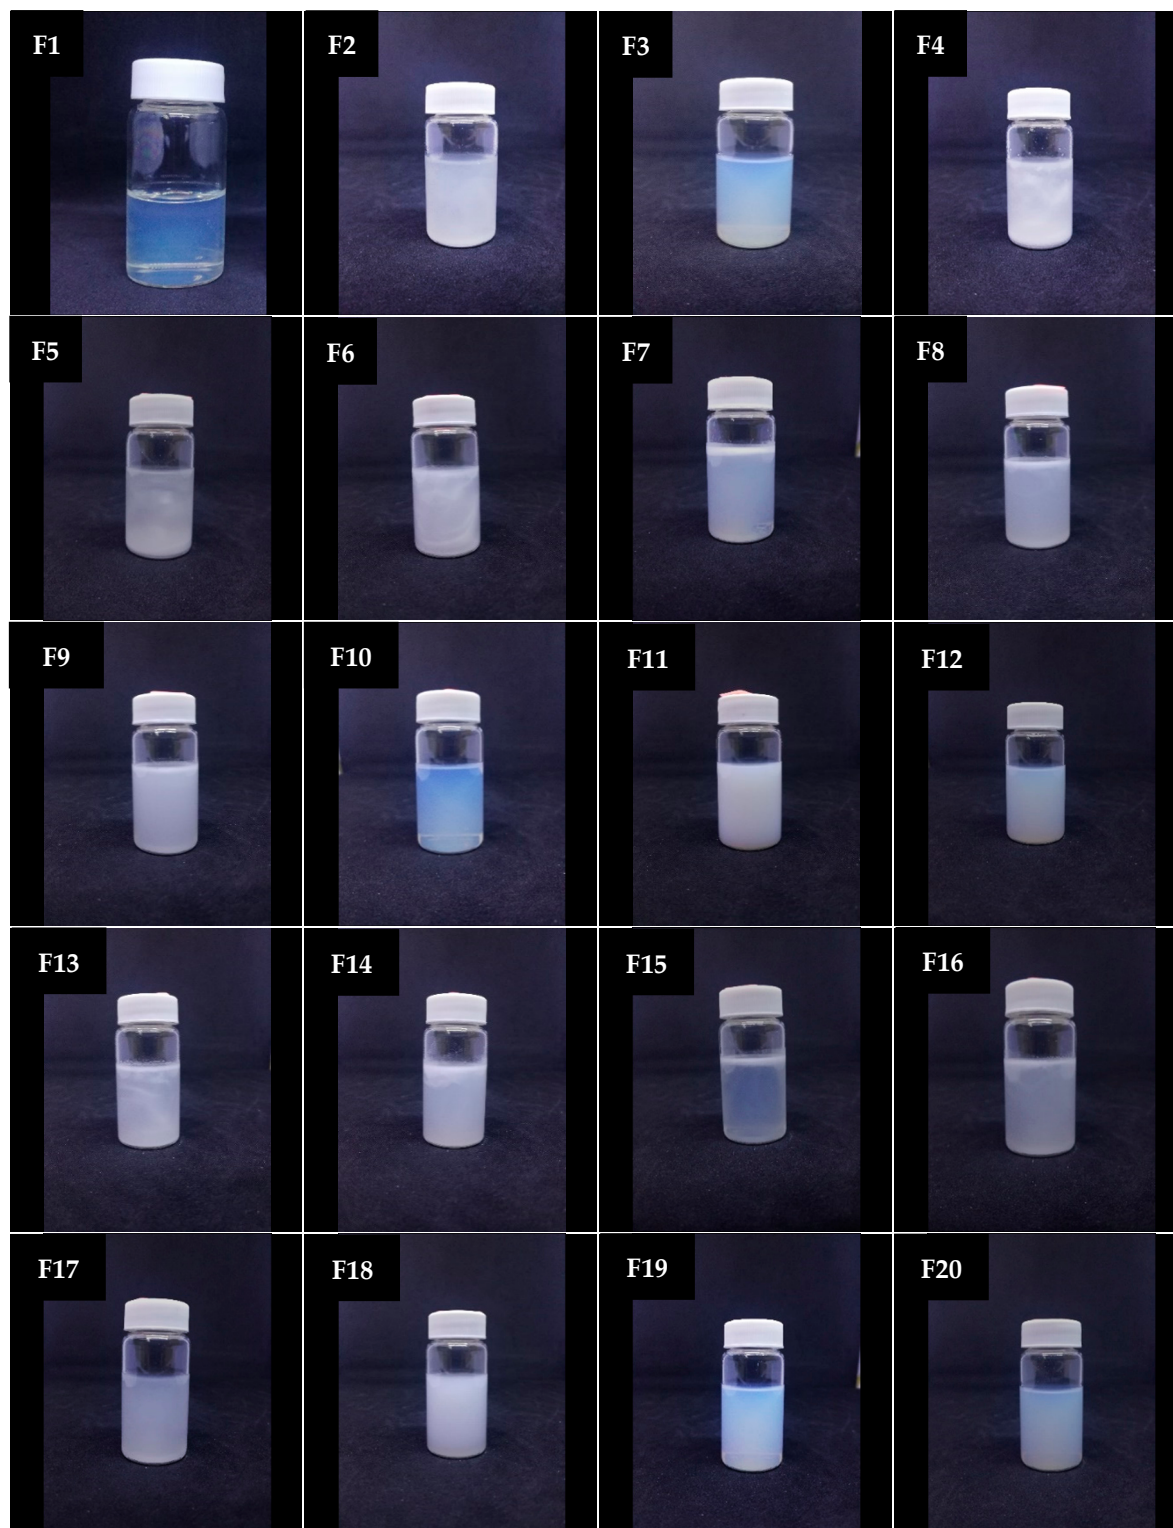

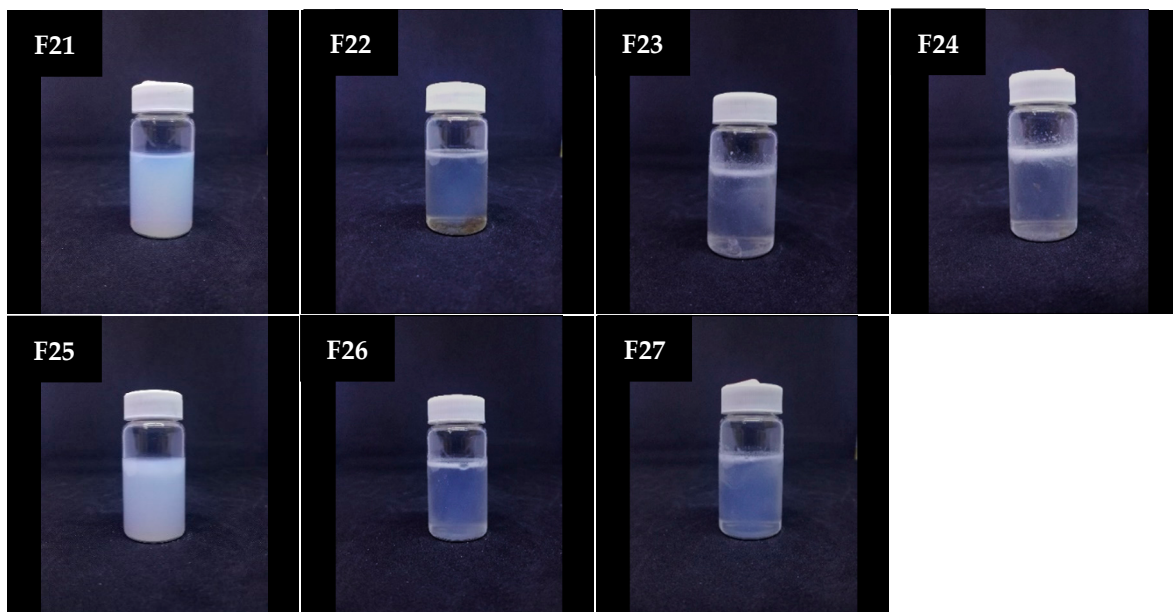

Supplement: s1 [file s1]
